# Supplementary material for: Measurement report: Molecular composition and volatility ofgaseous organic compounds in a boreal forest: from volatileorganic compounds to highly oxygenated organic molecules
Source: Copernicus journal article supplement (doi:10.5194/acp-2020-1257), 2020-12-23
Supplement: Supplementary file 1 [file acp-2020-1257-supplement.pdf]

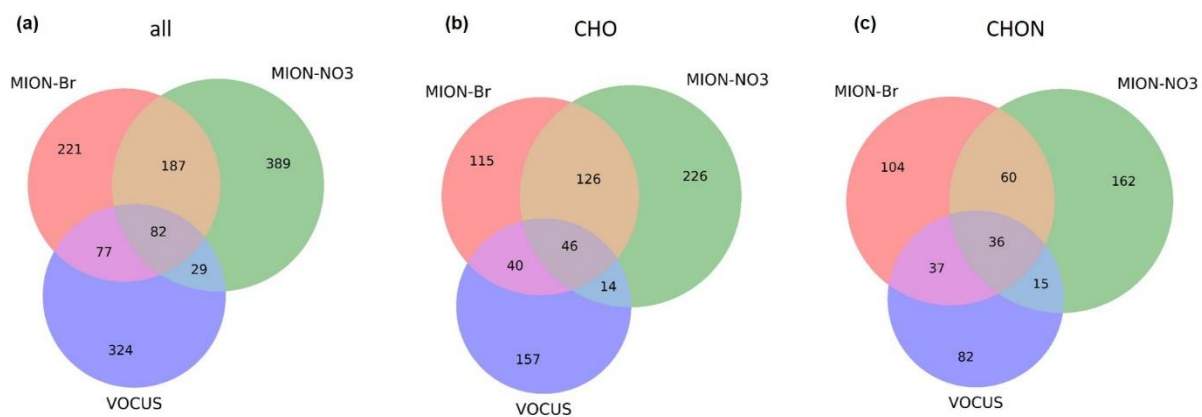

**Figure S1.** Overlaps of all organic compounds **(a)**, CHO compounds **(b)**, and CHON compounds **(c)** measured by Vocus, MION-Br, and MION-NO<sub>3</sub>.

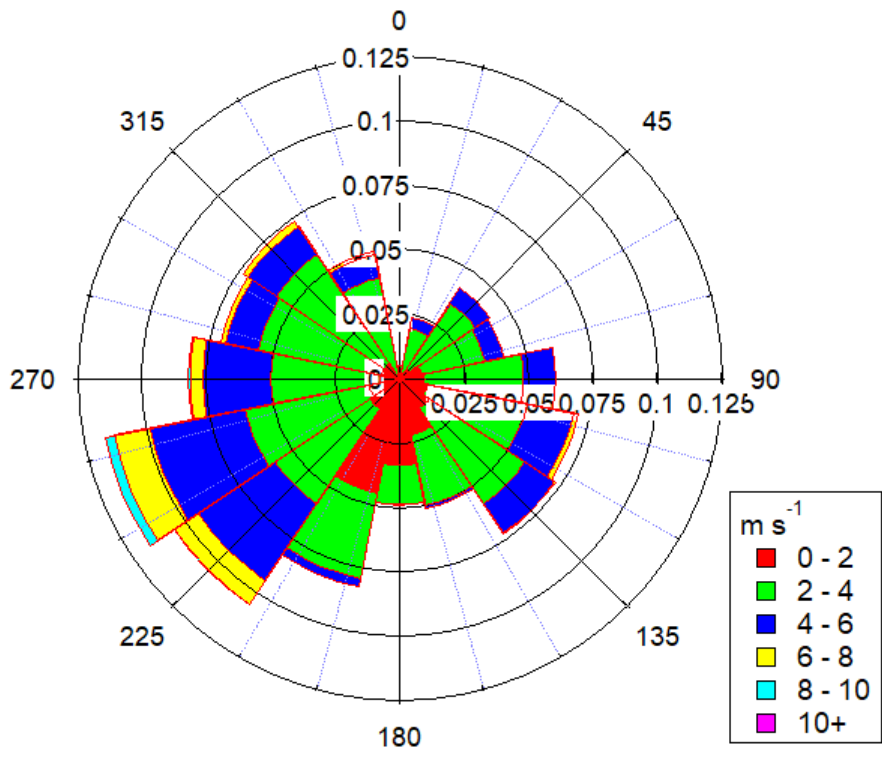

5 **Figure S2.** Wind speeds and directions during the measurement period.

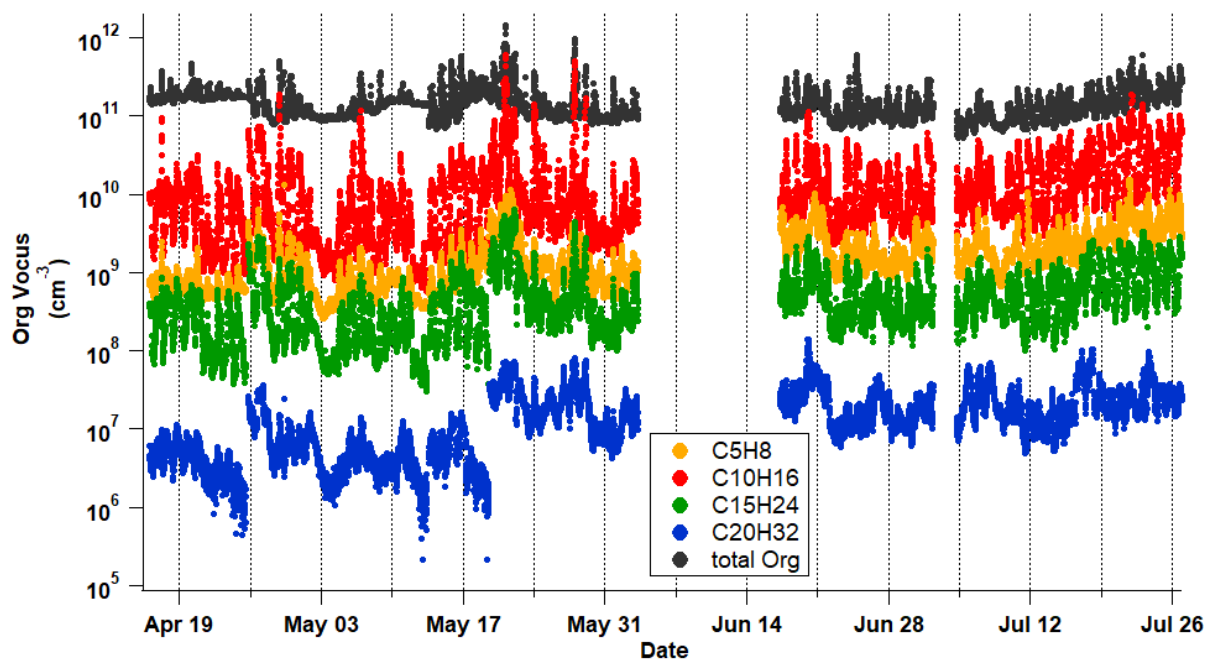

**Figure S3.** Time series of terpenes (isoprene, monoterpenes, sesquiterpenes, and diterpenes) and all organic compounds (for comparison, same as in Fig. 1f) measured by Vocus.

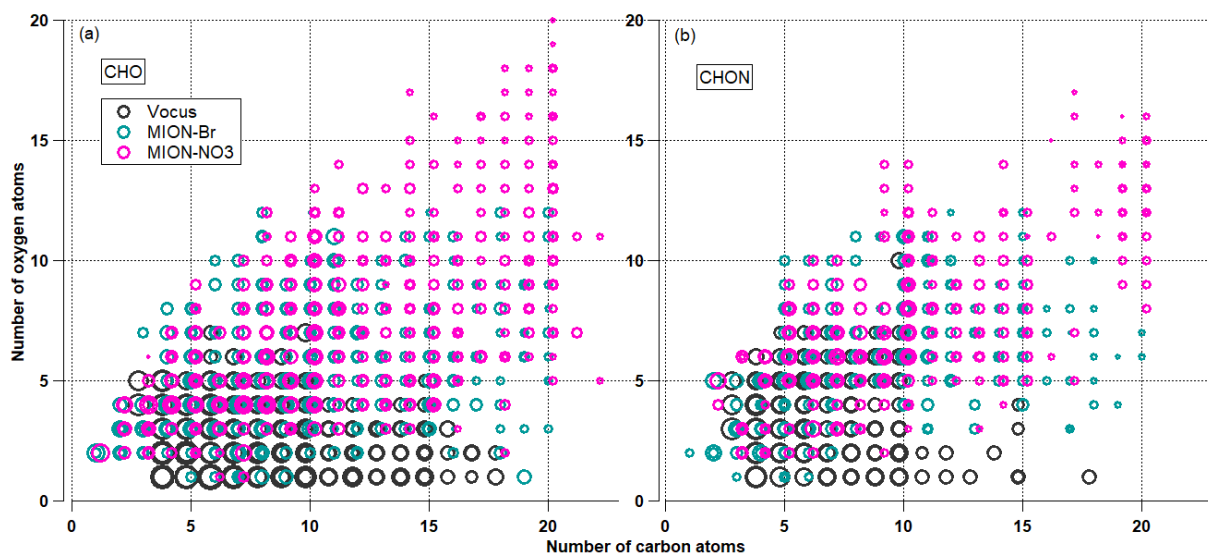

10 **Figure S4.** Distribution of CHO compounds (a) and CHON compounds (b) measured by Vocus, MION-Br, and MION-NO<sub>3</sub> as a function of number of oxygen atoms vs. number of carbon atoms. Markers were sized by the logarithm of their corresponding concentrations.

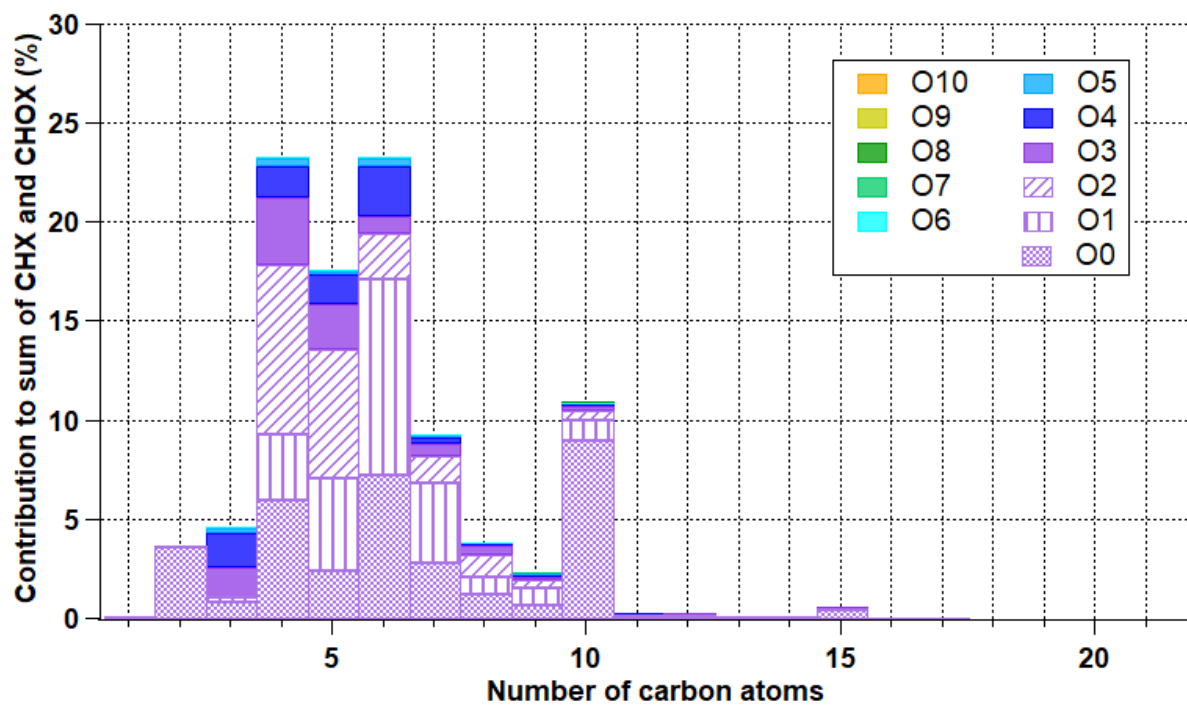

15 **Figure S5.** Contribution of organic compounds with different number of oxygen atoms to all organic compounds (including CHX compounds) as a function of the number of carbon atoms measured by Vocus.

**Table S1.** Sum contribution (% , average  $\pm$  1 standard deviation) of C<sub>x</sub>H, C<sub>x</sub>HO, and C<sub>x</sub>HON groups (x = 5, 10, 15, and 20) to total CH, CHO and CHON compounds measured by different measurement techniques.

| Compound group          | Vocus             | MION-Br          | MION-NO <sub>3</sub> |
|-------------------------|-------------------|------------------|----------------------|
| C <sub>x</sub> H/CH     | 35.5 $\pm$ 11.3 % | -                | -                    |
| C <sub>x</sub> HO/CHO   | 27.3 $\pm$ 3.2 %  | 20.0 $\pm$ 4.4 % | 26.8 $\pm$ 5.7 %     |
| C <sub>x</sub> HON/CHON | 16.2 $\pm$ 2.3 %  | 34.9 $\pm$ 4.2 % | 38.6 $\pm$ 4.5 %     |

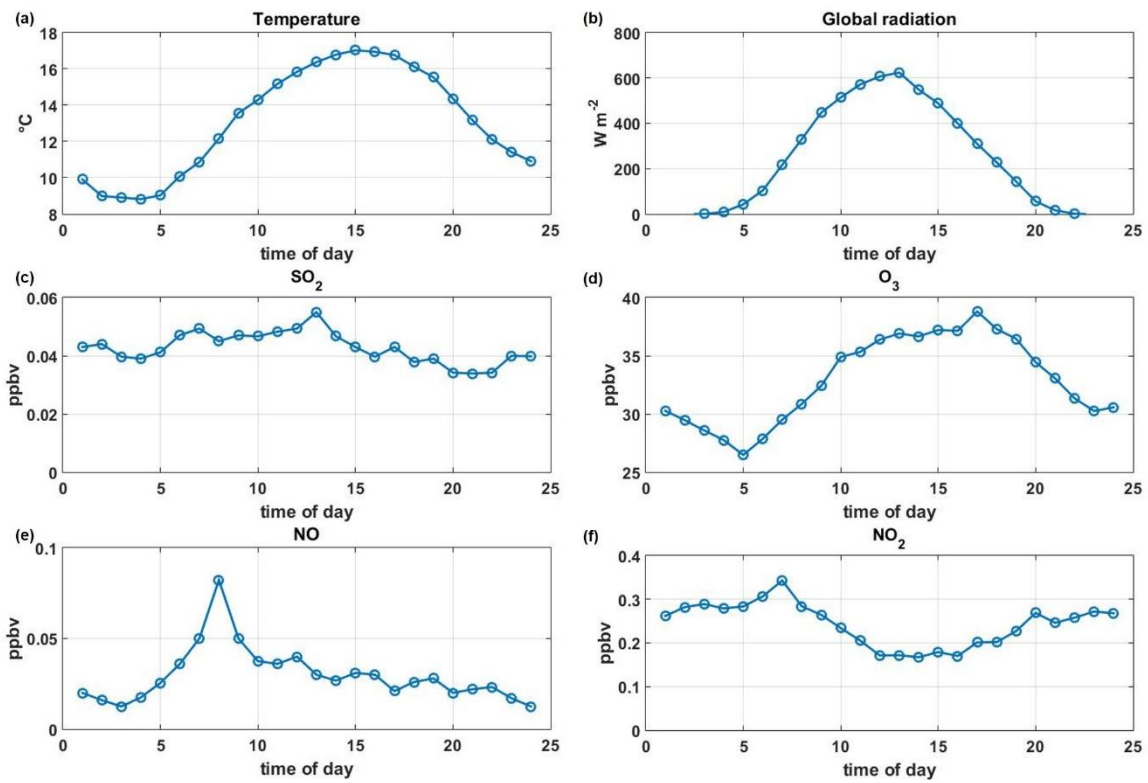

20 **Figure S6.** The median diurnal patterns of temperature (a), global radiation (b), mixing ratios of SO<sub>2</sub> (c), O<sub>3</sub> (d), NO (e), and NO<sub>2</sub> (f) during the measurement period.

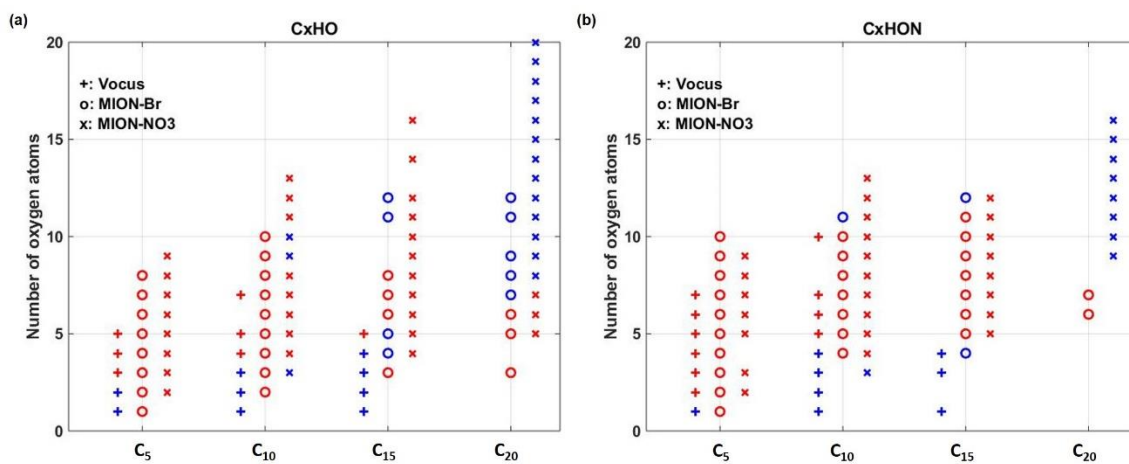

**Figure S7.** Comparison of the daytime (between 10:00 and 17:00) and nighttime (between 22:00 and 05:00) levels of C<sub>x</sub>HO (a) and C<sub>x</sub>HON (b) compounds (x = 5, 10, 15, 20) as a function of the number of oxygen atoms measured by Vocus (in pluses), MION-Br (in circles), and MION-NO<sub>3</sub> (in crosses). Compounds with higher signals during the daytime are colored in red and those with higher signals during the nighttime are colored in blue.



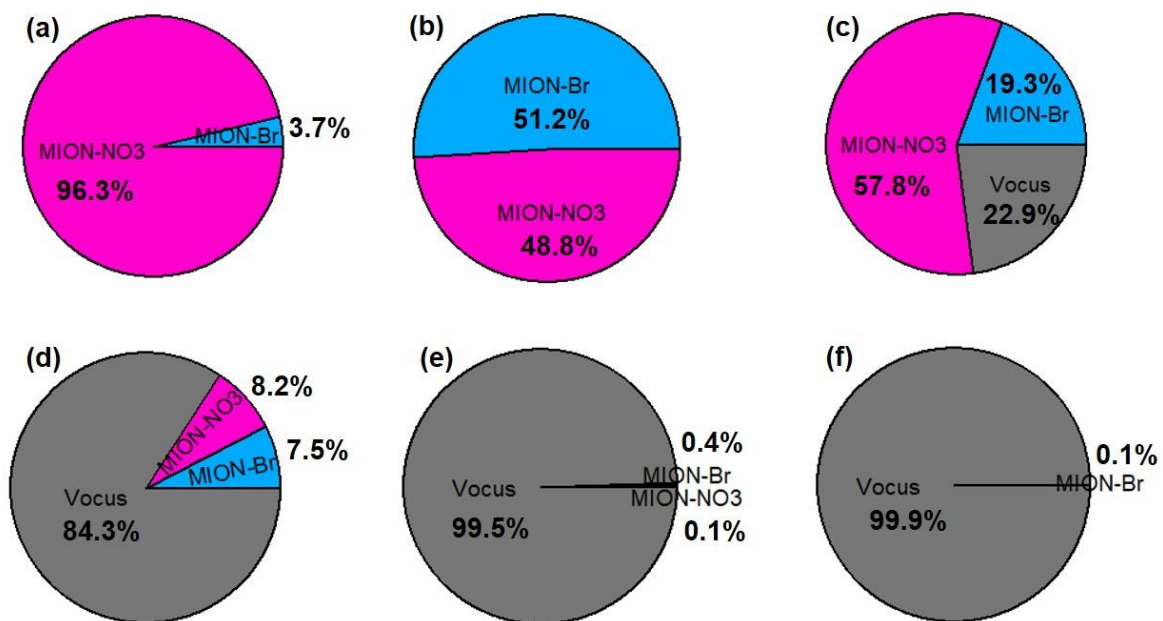

**Figure S8.** Fraction of ULVOC (a), ELVOC (b), LVOC (c), SVOC (d), IVOC (e), and VOC (f) detected by Vocus, MION-Br, and MION-NO<sub>3</sub>.

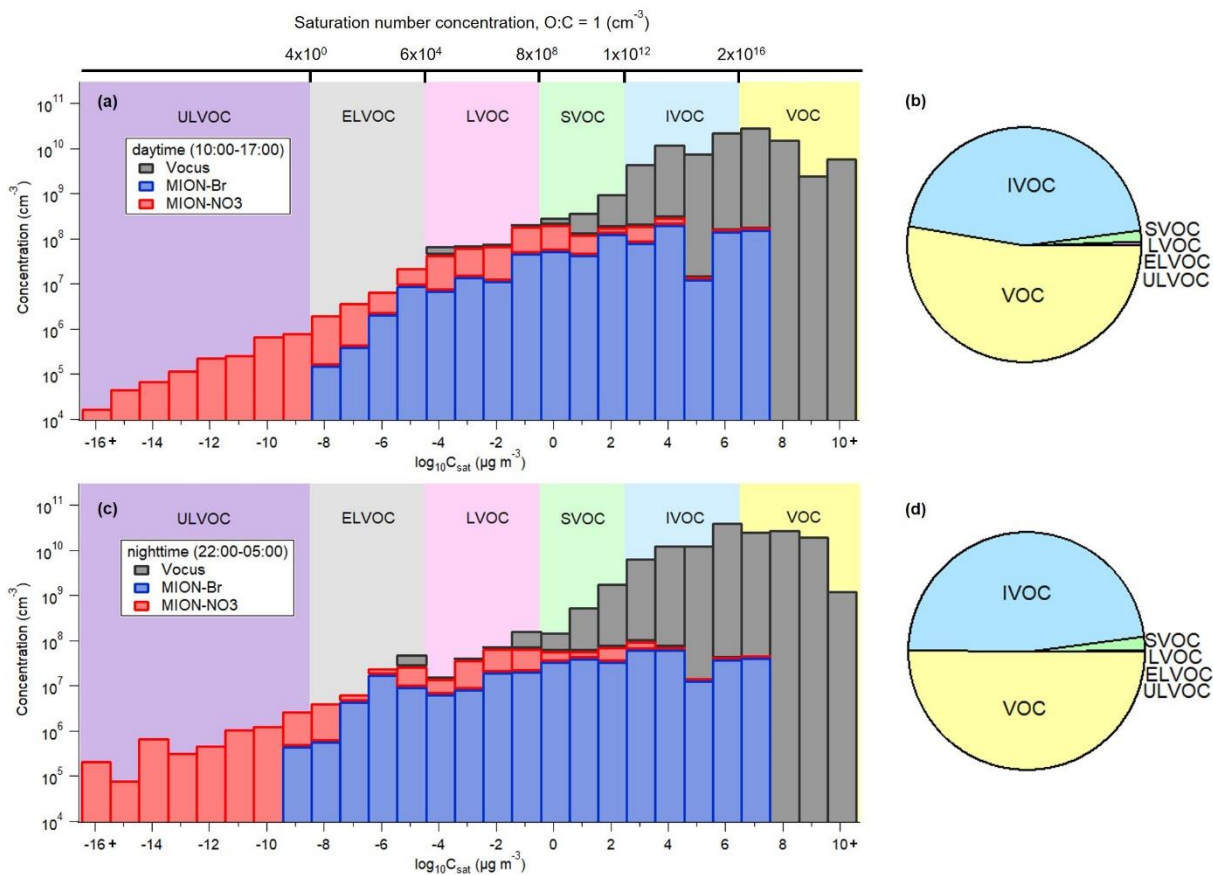

30

**Figure S9.** Stacked bar plots of combined volatility distribution for measured organic compounds parameterized with the approach of Li et al. (2016) during the daytime (a) and nighttime (c); resulting pie charts for the contributions of VOC, IVOC, SVOC, LVOC, ELVOC, and ULVOC during the daytime (b) and nighttime (d).

## References

- 35 Li, Y., Pöschl, U., and Shiraiwa, M.: Molecular corridors and parameterizations of volatility in the chemical evolution of organic aerosols, *Atmos Chem Phys*, 16, 3327–3344, <https://doi.org/10.5194/acp-16-3327-2016>, 2016.
